# Supplementary material
Source: MDPI journal article supplement (https://www.mdpi.com/2071-1050/14/20/13293)
Supplement: s1 [file s1]

## Supplementary Material: Life Cycle Costing

For LCC, there were parameters required to calculate the waste generated, waste collected, energy generated as well as for economic assessment. These parameters are represented in Tables S1-S7 below.

**Table S1.** The parameters for the projection of the Population and Waste Generated and Collected

| City  | Year                             | Population | Population Growth Rate | Waste Generation Rate (kg/capita/day) |
|-------|----------------------------------|------------|------------------------|---------------------------------------|
| Lagos | 2022                             | 15387639   | 0.032                  | 0.72                                  |
| Abuja | 2022                             | 3464000    | 0.0567                 | 0.66                                  |
| Days  | Conversion Factor (Kg to tonnes) |            | Collected Fraction     |                                       |
| 365   | 1000                             |            | 0.4                    |                                       |

**Table S2.** The waste fraction for WtE Processes

| City  | AD Process Fraction | Incineration Fraction | Gasification Fraction | LFGTE Fraction |
|-------|---------------------|-----------------------|-----------------------|----------------|
| Lagos | 0.46                | 0.48                  | 0.94                  | 1              |
| Abuja | 0.47                | 0.41                  | 0.88                  | 1              |

**Table S3.** The energy generating potential of the WtE Processes.

| Energy Generating Potential (kWh/t) | AD  | Incineration | Gasification | LFGTE |
|-------------------------------------|-----|--------------|--------------|-------|
| Lagos                               | 683 | 549          | 626          | 171   |
| Abuja                               | 667 | 441          | 639          | 135   |

**Table S4.** The average population, waste generated and wasted collected over a 20-year period.

| City  | Average Population | Average Waste Generated (t) | Average Waste Collected (t) |
|-------|--------------------|-----------------------------|-----------------------------|
| Lagos | 21470392.43        | 5642419.131                 | 2256967.652                 |
| Abuja | 6353994.284        | 1530677.223                 | 612270.8892                 |

**Table S5.** The amount of waste processed for the WtE systems.

| City  | Waste for AD process (tonnes) | Waste for Incineration process (tonnes) | Waste for Gasification process (tonnes) | Waste for LFGTE process (tonnes) |
|-------|-------------------------------|-----------------------------------------|-----------------------------------------|----------------------------------|
| Lagos | 1038205.12                    | 1083344.473                             | 1909394.634                             | 2256967.652                      |
| Abuja | 287767.3179                   | 251031.0646                             | 538798.3825                             | 612270.8892                      |

**Table S6.** The amount of energy generated from the WtE systems.

| Electricity Generated (kWh) | AD          | Incineration | Gasification | LFGTE       |
|-----------------------------|-------------|--------------|--------------|-------------|
| Lagos                       | 709094097   | 594756115.8  | 1195281041   | 385941468.6 |
| Abuja                       | 191940801.1 | 110704699.5  | 344292166.4  | 82656570.04 |

**Table S7.** The plant size/ kW capacity for the WtE systems.

| Plant Size (kW) | AD      | Incineration | Gasification | LFGTE   |
|-----------------|---------|--------------|--------------|---------|
| Lagos           | 80946.8 | 75438.4      | 136447.6     | 44057.2 |
| Abuja           | 21911.1 | 14041.7      | 39302.8      | 9435.7  |

From the tables, the following sample calculations for waste generated, waste collected, and waste processed, energy generated, plant size and the economic assessment are given below for each of the WtE systems for both cities.

**AD (Lagos):**

$$\begin{aligned}
 (1) \text{ Waste Generated} &= (P(t) \times Wgr \times 365)/1000 \\
 &= (21470392.43 \times 0.72 \times 365)/1000 \\
 &= 5642419.13 \text{ t}
 \end{aligned}$$

$$\begin{aligned}
 (2) \text{ Waste Collected} &= 5642419.13 \times 0.4 \\
 &= 2256967.652 \text{ t}
 \end{aligned}$$

$$\begin{aligned}
 (3) \text{ Waste processed for AD} &= 2256967.652 \times 0.47 \\
 &= 1038205.12 \text{ t}
 \end{aligned}$$

$$\begin{aligned}
 (4) \text{ Energy Generated from AD} &= \text{Waste processed from AD} \times \text{Energy generating Potential} \\
 &= 1038205.12 \text{ t} \times 683 \text{ kWh / t} \\
 &= 709094097 \text{ kWh}
 \end{aligned}$$

$$\begin{aligned}
 (5) \text{ Size} &= \text{Energy Generated} / \text{Operating hours} \\
 &= 709094097 \text{ kWh} \div 8760 \text{ h} \\
 &= 80946.8 \text{ kW}
 \end{aligned}$$

$$\begin{aligned}
 (6) \text{ Capital Cost} &= \text{U\$}4339 / \text{kw} \times 80946.8 \text{ kW} \\
 &= \text{U\$}351228229.1
 \end{aligned}$$

$$\begin{aligned}
 (7) \text{ O\&M Cost} &= 0.03 \times \text{Capital Cost} + \text{U\$}0.005 / \text{kWh} \times \text{Energy Generated (kWh)} \\
 &= 0.03 \times \text{U\$}351228229.1 + \text{U\$} 0.005 \times 709094097 \text{ kWh} \\
 &= \text{U\$}14082317.36
 \end{aligned}$$

$$\begin{aligned}
 (8) \text{ Revenue} &= \text{Electricity Tariff} \times \text{Electricity Generated} \\
 &= \text{U\$}0.1868/\text{kWh} \times 709094097 \text{ kWh} \\
 &= \text{U\$}132458777.3
 \end{aligned}$$

$$\begin{aligned}
 (9) \text{ Payback Period} &= \text{Capital Cost} / (\text{Revenue} - \text{O\&M Cost}) \\
 &= \text{U\$} 351228229.1 / (\text{U\$}132458777.3 - \text{\$}14082317.36) \\
 &= 2.97 \text{ years}
 \end{aligned}$$

### **AD (Abuja):**

- (1) Waste Generated =  $(P(t) \times Wgr \times 365)/1000$   
=  $(6353994.28 \times 0.66 \times 365) / 1000$   
= 1530677 t
- (2) Waste Collected =  $1530677 \times 0.4$   
= 612270.88 t
- (3) Waste processed for AD =  $612270.88 \times 0.47$   
= 287767.32 t
- (4) Energy Generated from AD = waste processed from AD x Energy generating potential  
=  $1038205.12 \times 667 \text{ kWh / t}$   
= 191940801.1 kWh
- (5) Size = Energy Generated / Operating hours  
=  $191940801.1 / 8760$   
= 21911.05 kW
- (6) Capital Cost =  $\$4339 / \text{kW} \times 21911.05 \text{ kW}$   
= U\$95072047.46
- (7) O\$M Cost =  $0.03 \times \text{capital cost} + \$0.005 / \text{kwh} \times \text{Energy Generated (kWh)}$   
=  $0.03 \times \$95072047.46 + \$0.005 \times 191940801.1 \text{ kWh}$   
= U\$3811865.429
- (8) Revenue = Electricity Tariff x Electricity Generated  
=  $\text{U\$}0.1868/\text{kWh} \times 191940801.1 \text{ kWh}$   
= \$35854541.6
- (9) Payback Period =  $\text{Capital Cost} / (\text{Revenue} - \text{O\$M Cost})$   
=  $\text{U\$}95072047.46 / (\text{U\$}35854541.6 - \text{U\$}3811865.429)$   
= 2.967 years

### **Incineration (Lagos)**

- (1) Waste processed for Incineration =  $2256967.652 \times 0.48$   
= 1083344.473 t
  - (2) Energy Generated = waste processed from incineration x Energy generating potential  
=  $1083344.4732 \times 549 \text{ kWh / t}$   
= 594756115.8 kWh
  - (3) Size = Energy Generated / Operating hours  
=  $594756115.8 / (0.9 \times 8760)$   
= 75438.37 kW
- Because incineration plants operate on a 90% basis
- (4) Capital Cost =  $\$16587 / \text{kW} \times (\text{size})^{0.82}$   
=  $\text{U\$}16587 / \text{kW} \times (75438.37)^{0.82}$   
= U\$165725601.5
  - (5) O\$M Cost =  $0.04 \times \text{capital cost}$

$$= 0.04 \times \text{U\$ } 594756115.8$$

$$= \text{U\$}6960475$$

$$(6) \text{ Revenue} = \text{Electricity Tariff} \times \text{Electricity Generated}$$

$$= \$0.1868 \times 594756115.8 \text{ kWh}$$

$$= \$132458777.3$$

$$(7) \text{ Payback Period} = \text{Capital Cost} / (\text{Revenue} - \text{O\&M Cost})$$

$$= \text{U\$}165725601.5 / (\text{U\$}132458777.3 - \text{U\$}6960475)$$

$$= 1.59 \text{ years}$$

### **Incineration (Abuja)**

$$(1) \text{ Waste processed for Incineration} = 612270.88 \times 0.41$$

$$= 251031.0646 \text{ t}$$

$$(2) \text{ Energy Generated} = \text{waste processed from incineration} \times \text{Energy generating potential}$$

$$= 251031.0646 \times 441 \text{ kWh / t}$$

$$= 110704699.5 \text{ kWh}$$

$$(3) \text{ Size} = \text{Energy Generated} \div \text{Operating hours}$$

$$= 110704699.5 \text{ kWh} / (0.9 \times 8760) \text{ h}$$

$$= 14041.69 \text{ kW}$$

Because incineration plants operate on a 90% basis

$$(4) \text{ Capital Cost} = \$16587 / \text{kW} \times (\text{size})^{0.82}$$

$$= \text{U\$}16587 / \text{kw} \times (14041.69\text{kW})^{0.82}$$

$$= \text{U\$}41749171.3$$

$$(5) \text{ O\&M Cost} = 0.04 \times \text{Capital Cost}$$

$$= 0.04 \times \text{U\$}41749171.3$$

$$= \text{U\$}1753466.195$$

$$(6) \text{ Revenue} = \text{Electricity Tariff} \times \text{Electricity Generated}$$

$$= \$0.1868 \times 110704699.5$$

$$= \$20679637.86$$

$$(7) \text{ Payback Period} = \text{Capital Cost} / (\text{Revenue} - \text{O\&M Cost})$$

$$= \text{U\$}41749171.3 / (\text{U\$}20679637.86 - \text{U\$}1753466.195)$$

$$= 2.21 \text{ years}$$

### **Gasification (Lagos)**

$$(1) \text{ Waste processed for Gasification} = 2256967.652 \times 0.94$$

$$= 2121549.593 \text{ t}$$

$$(2) \text{ Energy Generated} = \text{waste processed from gasification} \times \text{Energy generating potential}$$

$$= 2121549.593 \times 626 \text{ kWh / t}$$

$$= 1328090045 \text{ kWh}$$

$$(3) \text{ Size} = \text{Energy Generated} / \text{Operating hours}$$

$$= 1328090045 \div 8760$$

$$= 151608.4527 \text{ kW}$$

$$(4) \text{ Capital Cost} = \text{U\$}3925 / \text{kW} \times \text{size (Kw)}$$

$$= \text{U\$}3925 / \text{kW} \times 151608.4527\text{kW}$$

$$= \text{U\$}595063176.7$$

$$\begin{aligned}
 (5) \text{ O\$M Cost} &= 0.04 \times \text{Capital Cost} + \text{U\$}0.004 / \text{kWh} \times \text{Energy Generated (kWh)} \\
 &= 0.04 \times \text{U\$}595063176.7 + \text{U\$}0.004/\text{kWh} \times 1328090045 \text{ kWh} \\
 &= \text{U\$}29114887.3
 \end{aligned}$$

$$\begin{aligned}
 (6) \text{ Revenue} &= \text{Electricity Tariff} \times \text{Electricity Generated} \\
 &= \text{U\$}0.1868 \times 1328090045 \text{ kWh} \\
 &= \text{U\$}248087220.5
 \end{aligned}$$

$$\begin{aligned}
 (7) \text{ Payback Period} &= \text{Capital Cost} / (\text{Revenue} - \text{O\$M Cost}) \\
 &= \text{U\$}595063176.7 \div (\text{U\$}248087220.5 - \text{U\$}29114887.3) \\
 &= 2.71 \text{ years}
 \end{aligned}$$

### **Gasification (Abuja)**

$$\begin{aligned}
 (1) \text{ Waste processed for Gasification} &= 612270.882 \times 0.88 \\
 &= 538798.3825 \text{ t}
 \end{aligned}$$

$$\begin{aligned}
 (2) \text{ Energy Generated} &= \text{Waste processed from Gasification} \times \text{Energy Generating potential} \\
 &= 538798.3825 \times 639 \text{ kWh / t} \\
 &= 344292166.4 \text{ kWh}
 \end{aligned}$$

$$\begin{aligned}
 (3) \text{ Size} &= \text{Energy Generated} / \text{Operating hours} \\
 &= 344292166.4 \text{ kWh} \div 8760 \text{ h} \\
 &= 39302.759 \text{ kW}
 \end{aligned}$$

$$\begin{aligned}
 (4) \text{ Capital Cost} &= \$3925 / \text{kW} \times \text{size (kW)} \\
 &= \text{U\$}3925 / \text{kw} \times 39302.759 \text{ kW} \\
 &= \text{U\$}154263328
 \end{aligned}$$

$$\begin{aligned}
 (5) \text{ O\$M Cost} &= 0.04 \times \text{Capital Cost} + \text{U\$}0.004 / \text{kWh} \times \text{Energy Generated (kWh)} \\
 &= 0.04 \times \text{U\$}154263328 + \text{U\$}0.004/\text{kWh} \times 344292166.4 \text{ kWh} \\
 &= \text{U\$}7547702
 \end{aligned}$$

$$\begin{aligned}
 (6) \text{ Revenue} &= \text{Electricity Tariff} \times \text{Electricity Generated} \\
 &= \text{U\$}0.1868/\text{kWh} \times 344292166.4 \text{ kWh} \\
 &= \text{U\$}248087220.5
 \end{aligned}$$

$$\begin{aligned}
 (7) \text{ Payback Period} &= \text{Capital Cost} / (\text{Revenue} - \text{O\$M Cost}) \\
 &= \text{U\$}154263328 \div (\text{U\$}248087220.5 - \text{U\$}7547702) \\
 &= 2.717 \text{ years}
 \end{aligned}$$

### **LFGTE (Lagos)**

$$(1) \text{ Waste processed for LFGTE} = 2256967.652 \text{ t}$$

$$\begin{aligned}
 (2) \text{ Energy Generated} &= \text{Waste processed from LFGTE} \times \text{Energy generating potential} \\
 &= 2256967.65 \times 171 \text{ kWh / t} \\
 &= 3859141468.6 \text{ kWh}
 \end{aligned}$$

$$\begin{aligned}
 (3) \text{ Size} &= \text{Energy Generated} / \text{Operating hours} \\
 &= 3859141468.6 \text{ kWh} / 8760 \text{ h} \\
 &= 44057.25 \text{ kW}
 \end{aligned}$$

$$\begin{aligned}
 (4) \text{ Capital Cost} &= C_V + C_W + C_{Kout} + C_{eng} + C_{ICE} \\
 C_V &= \text{U\$}85 \times 50 \text{ (65-10)} \\
 &= \text{U\$}85 / \text{ft} \times 50 \times 55 \text{ ft}
 \end{aligned}$$

$$\begin{aligned}
&= \text{U\$}233750 \\
C_W &= \text{U\$}17000 \times 50 \\
&= \text{U\$}850000 \\
C_{Kout} &= \text{U\$}4600 \times (72.59 \text{ m}^3 / \text{t} \times 2256967.652 \text{ t})^{0.6} \\
&= \text{U\$}390300502.4 \\
C_{eng} &= \text{U\$}700 \times 50 \\
&= \text{U\$}35000 \\
C_{ICE} &= \text{U\$}1100000 + (\text{U\$}1300 / \text{kw} \times 44057.25 \text{ kw}) \\
&= \text{U\$}58374418.85 \\
\text{Capital Cost} &= \$449793671.3
\end{aligned}$$

$$\begin{aligned}
(5) \text{ O\$M Cost} &= \text{U\$}5100 + (\text{U\$}2600 \times 50) + (\text{U\$}0.025 / \text{kWh} \times 3859141468.6 \text{ kwh}) \\
&= \text{U\$}9783636.7
\end{aligned}$$

$$\begin{aligned}
(6) \text{ Revenue} &= \text{Electricity Tariff} \times \text{Electricity Generated} \\
&= \text{U\$}0.1868 / \text{kWh} \times 3859141468.6 \text{ kWh} \\
&= \text{U\$}72093866.3
\end{aligned}$$

$$\begin{aligned}
(7) \text{ Payback Period} &= \text{Capital Cost} / (\text{Revenue} - \text{O\$M Cost}) \\
&= \text{U\$}449793671.3 / (\text{U\$}72093866.3 - \text{U\$}9783636.7) \\
&= 7.2 \text{ years}
\end{aligned}$$

### **LFGTE (Abuja)**

$$(1) \text{ Waste processed for LFGTE} = 612270.8892 \text{ t}$$

$$\begin{aligned}
(2) \text{ Energy Generated} &= \text{waste processed from LFGTE} \times \text{Energy generating potential} \\
&= 612270.8892 \times 135 \text{ kWh} / \text{t} \\
&= 82656570.04 \text{ kWh}
\end{aligned}$$

$$\begin{aligned}
(3) \text{ Size} &= \text{Energy Generated} / \text{Operating hours} \\
&= 82656570.04 \text{ kWh} \div 8760 \text{ h} \\
&= 9435.68 \text{ kW}
\end{aligned}$$

$$\begin{aligned}
(4) \text{ Capital Cost} &= C_V + C_W + C_{Kout} + C_{eng} + C_{ICE} \\
C_V &= \text{U\$}85 \times 50 (65-10) \\
&= \text{U\$}85 / \text{ft} \times 50 \times 55 \text{ ft} \\
&= \text{U\$}233750 \\
C_W &= \text{U\$}17000 \times 50 \\
&= \text{U\$}850000 \\
C_{Kout} &= \text{U\$}4600 \times (62.29 \text{ m}^3 / \text{t} \times 612270.8892 \text{ t})^{0.6} \\
&= \text{U\$}162770237.4 \\
C_{eng} &= \text{U\$}700 \times 50 \\
&= \text{U\$}35000 \\
C_{ICE} &= \text{U\$}1100000 + (\text{U\$}1300 / \text{kWh} \times 82656570.04 \text{ kWh}) \\
&= \text{U\$}13366385.97
\end{aligned}$$

$$\text{Capital Cost} = \$177255373.4$$

$$\begin{aligned}
(5) \text{ O\$M Cost} &= \text{U\$}5100 + (\text{U\$}2600 \times 50) + (\text{U\$}0.025 / \text{kWh} \times 82656570.04 \text{ kWh}) \\
&= \text{U\$}2201514.251
\end{aligned}$$

$$\begin{aligned}
(6) \text{ Revenue} &= \text{Electricity Tariff} \times \text{Electricity Generated} \\
&= \text{U\$}0.1868 / \text{kWh} \times 82656570.04 \text{ kWh} \\
&= \text{U\$}15440247.3
\end{aligned}$$

$$\begin{aligned}
 (7) \text{ Payback Period} &= \text{Capital Cost} \div (\text{Revenue} - \text{O\&M Cost}) \\
 &= \text{U\$}177255373.4 \div (\text{U\$}15440247.3 - \text{U\$}2201514.251) \\
 &= 13.39 \text{ years}
 \end{aligned}$$

The summary of the results from the economic assessment for the WtE systems are given in Tables S 8 –9. This is followed by Tables S 10-11 the results of the economic indicators calculated on a per tonnes basis by dividing with amount of waste processed for each WtE systems. While Tables S12 -13 gives the population and waste projections for Lagos and Abuja.

**Table S8.** The economic assessment for the WtE systems for Lagos

| Economic Indicators | LFGTE       | Gasification | Incineration | AD          |
|---------------------|-------------|--------------|--------------|-------------|
| Capital Cost (U\$)  | 449793671.3 | 535556859    | 165725601.5  | 351228229.1 |
| O&M Cost (U\$)      | 9783636.714 | 26203398.5   | 6960475.263  | 14082317.36 |
| Revenue (U\$)       | 72093866.33 | 223278498    | 111100442.4  | 132458777.3 |
| LCOE (U\$/kWh)      | 0.165220429 | 0.07712625   | 0.045807208  | 0.080372347 |
| LCC (U\$)           | 542870922.6 | 784844561    | 231944526.4  | 485201252.6 |
| NPV (U\$)           | 80688438.94 | 1142254562   | 720876644.7  | 656577305.7 |
| IRR (%)             | 0.125512937 | 0.36727582   | 0.628351345  | 0.336008916 |
| PBP (Years)         | 7.218616815 | 2.71752677   | 1.591373668  | 2.967044539 |

**Table S9.** The economic assessment for the WtE systems for Abuja

| Economic Indicators | LFGTE      | Gasification | Incineration | AD          |
|---------------------|------------|--------------|--------------|-------------|
| Capital Cost (U\$)  | 177255373  | 154263328    | 41749171.3   | 95072047.46 |
| O&M Cost (U\$)      | 2201514.25 | 7547701.785  | 1753465.195  | 3811865.429 |
| Revenue (U\$)       | 15440247.3 | 64313776.69  | 20679637.86  | 35854541.64 |
| LCOE (U\$/kWh)      | 0.28165278 | 0.077126253  | 0.061996181  | 0.080372347 |
| LCC (U\$)           | 198199619  | 226068869.9  | 58430874.16  | 131336472.1 |
| NPV (U\$)           | -64546576  | 329018267.8  | 119380005.7  | 177725318.2 |
| IRR (%)             | 0.04169039 | 0.367275821  | 0.453073065  | 0.336008916 |
| PBP (Years)         | 13.3891493 | 2.717526767  | 2.205896144  | 2.967044539 |

**Table S10.** The economic assessment on a per tonne basis for the WtE systems for Lagos

| Economic Indicators  | LFGTE       | Gasification | Incineration | AD          |
|----------------------|-------------|--------------|--------------|-------------|
| Capital Cost (U\$/t) | 199.2911466 | 280.48516    | 152.9759053  | 338.3033105 |
| O&M Cost (U\$/t)     | 4.334859077 | 13.7234064   | 6.424988021  | 13.56409932 |
| Revenue (U\$/t)      | 31.9428     | 116.9368     | 102.5532     | 127.5844    |
| LCOE (U\$/kWh)       | 0.165220429 | 0.07712625   | 0.045807208  | 0.080372347 |
| LCC (U\$/t)          | 240.5311046 | 411.043661   | 214.1004382  | 467.3462336 |
| NPV (U\$/t)          | 35.75081763 | 598.228643   | 665.4177527  | 632.4157847 |
| IRR (%)              | 12.55129365 | 36.7275821   | 62.83513451  | 33.60089155 |
| PBP (Years)          | 7.218616815 | 2.71752677   | 1.591373668  | 2.967044539 |

**Table S11.** The economic assessment on a per tonne basis for the WtE systems for Abuja

| <b>Economic Indicators</b> | <b>LFGTE</b> | <b>Gasification</b> | <b>Incineration</b> | <b>AD</b>   |
|----------------------------|--------------|---------------------|---------------------|-------------|
| Capital Cost (U\$/t)       | 289.50482    | 286.3099315         | 166.3107766         | 330.3781963 |
| O&M Cost (U\$/t)           | 3.59565397   | 14.00839726         | 6.985052618         | 13.24634589 |
| Revenue (U\$/t)            | 25.218       | 119.3652            | 82.3788             | 124.5956    |
| LCOE (U\$/kWh)             | 0.28165278   | 0.077126253         | 0.061996181         | 0.080372347 |
| LCC (U\$/t)                | 323.712303   | 419.5797115         | 232.7635198         | 456.398152  |
| NPV (U\$/t))               | -105.4216    | 610.6519219         | 475.5586958         | 617.6007737 |
| IRR (%)                    | 4.16903875   | 36.72758206         | 45.30730652         | 33.60089155 |
| PBP (Years)                | 13.3891493   | 2.717526767         | 2.205896144         | 2.967044539 |

Tables S12-13 gives the population and waste projection for Lagos and Abuja for 2022-2042.

**Table S12.** The projected population for Lagos and Abuja

| <b>Year</b>               | <b>Projected Population of Lagos</b> | <b>Projected Population of Abuja</b> |
|---------------------------|--------------------------------------|--------------------------------------|
| 2022                      | 15387639                             | 3464000                              |
| 2023                      | 15880044                             | 3660409                              |
| 2024                      | 16388205                             | 3867954                              |
| 2025                      | 16912627                             | 4087267                              |
| 2026                      | 17453832                             | 4319015                              |
| 2027                      | 18012354                             | 4563903                              |
| 2028                      | 18588749                             | 4822677                              |
| 2029                      | 19183589                             | 5096122                              |
| 2030                      | 19797464                             | 5385072                              |
| 2031                      | 20430983                             | 5690406                              |
| 2032                      | 21084775                             | 6013052                              |
| 2033                      | 21759487                             | 6353992                              |
| 2034                      | 22455791                             | 6714263                              |
| 2035                      | 23174376                             | 7094962                              |
| 2036                      | 23915956                             | 7497247                              |
| 2037                      | 24681266                             | 7922340                              |
| 2038                      | 25471067                             | 8371537                              |
| 2039                      | 26286141                             | 8846203                              |
| 2040                      | 27127298                             | 9347783                              |
| 2041                      | 27995372                             | 9877802                              |
| 2042                      | 28891224                             | 10437874                             |
| <b>Average Population</b> | <b>21470392</b>                      | <b>6353994</b>                       |



**Table S13** The projected waste generation for Lagos and Abuja

| <b>Year</b>                        | <b>Projected Waste Generated<br/>for Lagos (t)</b> | <b>Projected Waste Generated for<br/>Abuja (t)</b> |
|------------------------------------|----------------------------------------------------|----------------------------------------------------|
| 2022                               | 4043871.529                                        | 834477.6                                           |
| 2023                               | 4173275.418                                        | 881792.4799                                        |
| 2024                               | 4306820.232                                        | 931790.1135                                        |
| 2025                               | 4444638.479                                        | 984622.613                                         |
| 2026                               | 4586866.91                                         | 1040450.715                                        |
| 2027                               | 4733646.651                                        | 1099444.271                                        |
| 2028                               | 4885123.344                                        | 1161782.761                                        |
| 2029                               | 5041447.291                                        | 1227655.843                                        |
| 2030                               | 5202773.605                                        | 1297263.93                                         |
| 2031                               | 5369262.36                                         | 1370818.794                                        |
| 2032                               | 5541078.755                                        | 1448544.22                                         |
| 2033                               | 5718393.276                                        | 1530676.677                                        |
| 2034                               | 5901381.86                                         | 1617466.045                                        |
| 2035                               | 6090226.08                                         | 1709176.37                                         |
| 2036                               | 6285113.315                                        | 1806086.67                                         |
| 2037                               | 6486236.941                                        | 1908491.784                                        |
| 2038                               | 6693796.523                                        | 2016703.268                                        |
| 2039                               | 6907998.011                                        | 2131050.344                                        |
| 2040                               | 7129053.948                                        | 2251880.898                                        |
| 2041                               | 7357183.674                                        | 2379562.545                                        |
| 2042                               | 7592613.552                                        | 2514483.741                                        |
| <b>Average Waste Generated (t)</b> | <b>5642419.131</b>                                 | <b>1530677.223</b>                                 |

**Table S14** Sensitivity Analysis: Variation of Capital Cost of WtE systems for Lagos and Abuja.

|            | <b>Capital Cost</b> |                     |                           |                           |                           |                           |                     |                     |
|------------|---------------------|---------------------|---------------------------|---------------------------|---------------------------|---------------------------|---------------------|---------------------|
|            | <b>10% Increase</b> | <b>10% Decrease</b> | <b>10% Increase</b>       | <b>10% Decrease</b>       | <b>10% Increase</b>       | <b>10% Decrease</b>       | <b>10% Increase</b> | <b>10% Decrease</b> |
| <b>(%)</b> | <b>AD Lagos</b>     | <b>AD Lagos</b>     | <b>Incineration Lagos</b> | <b>Incineration Lagos</b> | <b>Gasification Lagos</b> | <b>Gasification Lagos</b> | <b>LFGTE Lagos</b>  | <b>LFGTE Lagos</b>  |
| LCOE       | 9.304823324         | -9.304823324        | 10                        | -10                       | 9.420451747               | -9.420451747              | 8.285462576         | -8.285462576        |
| LCC        | 9.304823324         | -9.304823324        | 10                        | -10                       | 9.420451747               | -9.420451747              | 8.285462576         | -8.285462576        |
| NPV        | -6.715650123        | 6.715650123         | -3.120978503              | 3.120978503               | -6.28526058               | 6.28526058                | -55.74450035        | 55.74450035         |
| IRR        | -10.0850389         | 12.2560314          | -9.704546355              | 11.85760278               | -10.20763283              | 12.42280074               | -12.00922339        | 14.22271009         |
| PBP        | 10.98791829         | -10.79403422        | 10.7401617                | -10.59754539              | 11.20885213               | -10.96778966              | 10                  | -10                 |
|            | <b>10% Increase</b> | <b>10% Decrease</b> | <b>10% Increase</b>       | <b>10% Decrease</b>       | <b>10% Increase</b>       | <b>10% Decrease</b>       | <b>10% Increase</b> | <b>10% Decrease</b> |
| <b>(%)</b> | <b>AD Abuja</b>     | <b>AD Abuja</b>     | <b>Incineration Abuja</b> | <b>Incineration Abuja</b> | <b>Gasification Abuja</b> | <b>Gasification Abuja</b> | <b>LFGTE Abuja</b>  | <b>LFGTE Abuja</b>  |
| LCOE       | 9.304823324         | -9.304823324        | 10                        | -10                       | 9.420451747               | -9.420451747              | 8.94327516          | -8.94327516         |
| LCC        | 9.304823324         | -9.304823324        | 10                        | -10                       | 9.420451747               | -9.420451747              | 8.94327516          | -8.94327516         |
| NPV        | -6.715650123        | 6.715650123         | -4.747646698              | 4.747646698               | -6.28526058               | 6.28526058                | -27.46162291        | 27.46162291         |
| IRR        | -10.0850389         | 12.2560314          | -9.978278178              | 12.17400182               | -10.20763283              | 12.42280074               | -25.41615474        | 29.52450522         |
| PBP        | 10.98791829         | -10.79403422        | 11.02865426               | -10.82617443              | 11.20885213               | -10.96778966              | 10                  | -10                 |

**Table S15** Sensitivity Analysis: Variation of O&M Cost of WtE systems for Lagos and Abuja.

|            | <b>O&amp;M Cost</b> |                     |                           |                           |                           |                           |                     |                     |
|------------|---------------------|---------------------|---------------------------|---------------------------|---------------------------|---------------------------|---------------------|---------------------|
|            | <b>10% Increase</b> | <b>10% Decrease</b> | <b>10% Increase</b>       | <b>10% Decrease</b>       | <b>10% Increase</b>       | <b>10% Decrease</b>       | <b>10% Increase</b> | <b>10% Decrease</b> |
| <b>(%)</b> | <b>AD Lagos</b>     | <b>AD Lagos</b>     | <b>Incineration Lagos</b> | <b>Incineration Lagos</b> | <b>Gasification Lagos</b> | <b>Gasification Lagos</b> | <b>LFGTE Lagos</b>  | <b>LFGTE Lagos</b>  |
| LCOE       | 0.047341544         | -2.761184617        | 2.854946653               | -2.854946653              | 3.176268449               | -3.176268449              | 1.714537424         | -1.714537424        |
| LCC        | 0.047341544         | -2.761184617        | 2.854946653               | -2.854946653              | 3.176268449               | -3.176268449              | 1.714537424         | -1.714537424        |
| NPV        | 0.188495092         | 1.82599528          | -0.822033147              | 0.822033147               | -1.953017397              | 1.953017397               | -10.32286851        | 10.32286851         |
| IRR        | 0.02474894          | 1.207821941         | -0.66868362               | 0.668671349               | -1.343838048              | 1.343148326               | -2.047775289        | 2.037672433         |
| PBP        | 0.019205267         | -1.175635814        | 0.672874277               | -0.663939323              | 1.347531864               | -1.312168097              | 1.595196325         | -1.545876785        |
|            | <b>10% Increase</b> | <b>10% Decrease</b> | <b>10% Increase</b>       | <b>10% Decrease</b>       | <b>10% Increase</b>       | <b>10% Decrease</b>       | <b>10% Increase</b> | <b>10% Decrease</b> |
| <b>(%)</b> | <b>AD Abuja</b>     | <b>AD Abuja</b>     | <b>Incineration Abuja</b> | <b>Incineration Abuja</b> | <b>Gasification Abuja</b> | <b>Gasification Abuja</b> | <b>LFGTE Abuja</b>  | <b>LFGTE Abuja</b>  |
| LCOE       | 2.761184617         | -2.761184617        | 2.854946653               | -2.854946653              | 3.176268449               | -3.176268449              | 1.05672484          | -1.05672484         |
| LCC        | 2.761184617         | -2.761184617        | 2.854946653               | -2.854946653              | 3.176268449               | -3.176268449              | 1.05672484          | -1.05672484         |
| NPV        | -1.82599528         | 1.82599528          | -1.250480563              | 1.250480563               | -1.953017397              | 1.953017397               | -2.90375307         | 2.90375307          |
| IRR        | -1.208576926        | 1.207821941         | -0.929842087              | 0.929702036               | -1.343838048              | 1.343148326               | -4.557027067        | 4.518752426         |
| PBP        | 1.203943803         | -1.175635814        | 0.935140234               | -0.91797159               | 1.347531864               | -1.312168097              | 1.691055383         | -1.635733079        |

**Table S16** Sensitivity Analysis: Variation of Discount Rate of WtE systems for Lagos and Abuja.

| <b>Discount Rate</b> |                                  |                                  |                                            |                                            |                                            |                                            |                                     |                                     |
|----------------------|----------------------------------|----------------------------------|--------------------------------------------|--------------------------------------------|--------------------------------------------|--------------------------------------------|-------------------------------------|-------------------------------------|
| <b>(%)</b>           | <b>10% Increase<br/>AD Lagos</b> | <b>10% Decrease<br/>AD Lagos</b> | <b>10% Increase<br/>Incineration Lagos</b> | <b>10% Decrease<br/>Incineration Lagos</b> | <b>10% Increase<br/>Gasification Lagos</b> | <b>10% Decrease<br/>Gasification Lagos</b> | <b>10% Increase<br/>LFGTE Lagos</b> | <b>10% Decrease<br/>LFGTE Lagos</b> |
| LCOE                 | -4.361556551                     | 5.475272297                      | -4.414262129                               | 5.538080078                                | -4.594883751                               | 5.753321877                                | -3.773214535                        | 4.774161364                         |
| LCC                  | -1.596985237                     | 1.784902849                      | -1.651214348                               | 1.845513111                                | -1.837057106                               | 2.053224028                                | -0.99163632                         | 1.108322389                         |
| NPV                  | -9.920376807                     | 11.08770977                      | -7.948865868                               | 8.884210701                                | -9.493307356                               | 10.61038696                                | -42.49097786                        | 47.49090077                         |
| IRR                  | 0                                | 0                                | 0                                          | 0                                          | 0                                          | 0                                          | 0                                   | 0                                   |
| PBP                  | 0                                | 0                                | 0                                          | 0                                          | 0                                          | 0                                          | 0                                   | 0                                   |
| <b>(%)</b>           | <b>10% Increase<br/>AD Abuja</b> | <b>10% Decrease<br/>AD Abuja</b> | <b>10% Increase<br/>Incineration Abuja</b> | <b>10% Decrease<br/>Incineration Abuja</b> | <b>10% Increase<br/>Gasification Abuja</b> | <b>10% Decrease<br/>Gasification Abuja</b> | <b>10% Increase<br/>LFGTE Abuja</b> | <b>10% Decrease<br/>LFGTE Abuja</b> |
| LCOE                 | -4.361556551                     | 5.475272297                      | -4.414262129                               | 5.538080078                                | -4.594883751                               | 5.753321877                                | -3.403444487                        | 4.333516611                         |
| LCC                  | -1.596985237                     | 1.784902849                      | -1.651214348                               | 1.845513111                                | -1.837057106                               | 2.053224028                                | -0.611177521                        | 0.683094917                         |
| NPV                  | -9.920376807                     | 11.08770977                      | -8.723281558                               | 9.749752058                                | -9.493307356                               | 10.61038696                                | -11.2855285                         | 12.61349918                         |
| IRR                  | 0                                | 0                                | 0                                          | 0                                          | 0                                          | 0                                          | 0                                   | 0                                   |
| PBP                  | 0                                | 0                                | 0                                          | 0                                          | 0                                          | 0                                          | 0                                   | 0                                   |

**Table S17** Sensitivity Analysis: Variation of Collection Rate of WtE systems for Lagos and Abuja.

|            | <b>Collection Rate</b> |                     |                           |                           |                           |                           |                     |                     |
|------------|------------------------|---------------------|---------------------------|---------------------------|---------------------------|---------------------------|---------------------|---------------------|
|            | <b>10% Increase</b>    | <b>10% Decrease</b> | <b>10% Increase</b>       | <b>10% Decrease</b>       | <b>10% Increase</b>       | <b>10% Decrease</b>       | <b>10% Increase</b> | <b>10% Decrease</b> |
| <b>(%)</b> | <b>AD Lagos</b>        | <b>AD Lagos</b>     | <b>Incineration Lagos</b> | <b>Incineration Lagos</b> | <b>Gasification Lagos</b> | <b>Gasification Lagos</b> | <b>LFGTE Lagos</b>  | <b>LFGTE Lagos</b>  |
| LCOE       | 0                      | 0                   | -1.700950903              | 1.914586865               | 0                         | 0                         | -2.748042397        | 3.166457275         |
| LCC        | 10                     | -10                 | 8.128954006               | -8.276871821              | 10                        | -10                       | 6.977153363         | -7.150188453        |
| NPV        | 10                     | -10                 | 10.58394943               | -10.5377846               | 10                        | -10                       | 30.32093524         | -29.15675708        |
| IRR        | 0                      | 0                   | 1.846823804               | -2.0051405                | 0                         | 0                         | 4.429839537         | -4.809137107        |
| PBP        | 0                      | 0                   | -1.812577863              | 2.045170571               | 0                         | 0                         | -3.309784811        | 3.814962523         |
|            | <b>10% Increase</b>    | <b>10% Decrease</b> | <b>10% Increase</b>       | <b>10% Decrease</b>       | <b>10% Increase</b>       | <b>10% Decrease</b>       | <b>10% Increase</b> | <b>10% Decrease</b> |
| <b>(%)</b> | <b>AD Abuja</b>        | <b>AD Abuja</b>     | <b>Incineration Abuja</b> | <b>Incineration Abuja</b> | <b>Gasification Abuja</b> | <b>Gasification Abuja</b> | <b>LFGTE Abuja</b>  | <b>LFGTE Abuja</b>  |
| LCOE       | 0                      | 0                   | -1.700950903              | 1.914586865               | 0                         | 0                         | -3.232706942        | 3.731471605         |
| LCC        | 10                     | -10                 | 8.128954006               | -8.276871821              | 10                        | -10                       | 6.444022364         | -6.641675555        |
| NPV        | 10                     | -10                 | 10.88830653               | -10.81808038              | 10                        | -10                       | 0.898214231         | -0.291291451        |
| IRR        | 0                      | 0                   | 1.897141538               | -2.060325114              | 0                         | 0                         | 10.2061373          | -11.13983956        |
| PBP        | 0                      | 0                   | -1.855615739              | 2.095686185               | 0                         | 0                         | -3.638157352        | 4.209971568         |

**Table S18** Sensitivity Analysis: Variation of Energy Generating Efficiency of WtE systems for Lagos and Abuja.

| Energy Generation Efficiency |                       |                       |                                 |                                 |                                 |                                 |                          |                          |
|------------------------------|-----------------------|-----------------------|---------------------------------|---------------------------------|---------------------------------|---------------------------------|--------------------------|--------------------------|
| (%)                          | 10% Increase AD Lagos | 10% Decrease AD Lagos | 10% Increase Incineration Lagos | 10% Decrease Incineration Lagos | 10% Increase Gasification Lagos | 10% Decrease Gasification Lagos | 10% Increase LFGTE Lagos | 10% Decrease LFGTE Lagos |
| LCOE                         | 0                     | 0                     | -1.700950903                    | 1.914586865                     | 0                               | 0                               | -6.594645389             | 8.060122142              |
| LCC                          | 10                    | -10                   | 8.128954006                     | -8.276871821                    | 10                              | -10                             | 2.745890072              | -2.745890072             |
| NPV                          | 10                    | -10                   | 10.58394943                     | -10.5377846                     | 10                              | -10                             | 58.78882775              | -58.78882775             |
| IRR                          | 0                     | 0                     | 1.846823804                     | -2.0051405                      | 0                               | 0                               | 11.09498011              | -11.70089287             |
| PBP                          | 0                     | 0                     | -1.812577863                    | 2.045170571                     | 0                               | 0                               | -7.951462824             | 9.722712435              |
| (%)                          | 10% Increase AD Abuja | 10% Decrease AD Abuja | 10% Increase Incineration Abuja | 10% Decrease Incineration Abuja | 10% Increase Gasification Abuja | 10% Decrease Gasification Abuja | 10% Increase LFGTE Abuja | 10% Decrease LFGTE Abuja |
| LCOE                         | 0                     | 0                     | -1.700950903                    | 1.914586865                     | 0                               | 0                               | -7.626575043             | 9.321369497              |
| LCC                          | 10                    | -10                   | 8.128954006                     | -8.276871821                    | 10                              | -10                             | 1.610767453              | -1.610767453             |
| NPV                          | 10                    | -10                   | 10.88830653                     | -10.81808038                    | 10                              | -10                             | 15.73942413              | -15.73942413             |
| IRR                          | 0                     | 0                     | 1.897141538                     | -2.060325114                    | 0                               | 0                               | 24.93245075              | -26.52043324             |
| PBP                          | 0                     | 0                     | -1.855615739                    | 2.095686185                     | 0                               | 0                               | -8.546645045             | 10.46745918              |

### **Development of Scenarios**

The scenarios were developed based on the composition of the collected MSW for Lagos and Abuja in Table S 19.

**Table S19.** The Waste Composition of Lagos and Abuja (after [1] and [2]; complied by the authors).

| <b>Waste Components</b> | <b>Lagos (%)</b> | <b>Abuja (%)</b> |
|-------------------------|------------------|------------------|
| Food Waste              | 46               | 47               |
| Paper                   | 13               | 14               |
| Plastics                | 23               | 22               |
| Textiles                | 12               | 5                |
| Metal                   | 2                | 7                |
| Glass                   | 4                | 5                |
| <b>Total</b>            | <b>100</b>       | <b>100</b>       |

The food waste was considered as putrescible while paper, textiles, and plastics, were assigned as 'combustibles' and metals and glass as 'recyclables'. Thus, the scenarios for this study were as follows:

*AD Scenario:* This involves the separation of the food waste (Lagos: 46% and Abuja: 47% by mass for 1 tonne of MSW) from the rest of the MSW and transferring it to AD plants where it is used to produce biogas for combustion for electricity generation and digestate.

*Incineration Scenario:* In this scenario, the combustibles portion of the Wastes in both cities (Lagos: 48% and Abuja: 41% by mass for 1 tonne of MSW) is sorted and sent to the incineration plant where it is com-busted to produce electricity.

*Gasification Scenario:* Here, all the waste except the recyclables (Lagos: 94% and Abuja: 88 % by mass for 1 tonne of MSW) is used for energy recovery after the sorting process. Thus, energy via gasification is recovered from the food waste and combustible fractions, the residues from the gasification are assumed to be used as construction material, and the recyclables go to re-cycling.

*LFGTE Scenario:* This scenario involves the use of all the unsorted MSW transported to the landfill site. From here, landfill gas is collected, treated, and combusted for electricity production.

Overall Assumptions:

The following general assumptions have been made for all the LCC scenarios:

- It is assumed that the waste composition is constant throughout the period study for both cities.
- A constant of population growth of 3.2 and 5.67% was assumed for Lagos and Abuja respectively throughout the period of study.
- A 40% collection rate is assumed for the amount of MSW that was collected and transported to landfill site /WtE plants

- The only source of revenue considered is from the electricity generated from WtE systems for both cities. Other potential sources of revenues such as from the sales of digestate, solid residues and recyclables are not considered.

## References

1. LAWMA. *Lagos Waste Management Authority Report*; LAWMA: Lagos, Nigeria, 2019.
2. Amoo, O.M.; Fagbenle, R.L. Renewable municipal solid waste pathways for energy generation and sustainable development in the Nigerian context. *Int. J. Energy Environ. Eng.* **2013**, *4*, 1–17.
